# Supplementary material for: GrSMBMIP: intercomparison of the modelled 1980–2012 surface mass balance over the Greenland Ice Sheet
Source: Copernicus journal article supplement (doi:10.5194/tc-14-3935-2020), 2020-11-11
Supplement: Supplementary file 1 [file tc-14-3935-2020-supplement.pdf]

Supplement of The Cryosphere, 14, 3935–3958, 2020  
<https://doi.org/10.5194/tc-14-3935-2020-supplement>  
© Author(s) 2020. This work is distributed under  
the Creative Commons Attribution 4.0 License.

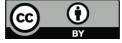

*Supplement of*

## **GrSMBMIP: intercomparison of the modelled 1980–2012 surface mass balance over the Greenland Ice Sheet**

**Xavier Fettweis et al.**

*Correspondence to:* Xavier Fettweis ([xavier.fettweis@uliege.be](mailto:xavier.fettweis@uliege.be))

The copyright of individual parts of the supplement might differ from the CC BY 4.0 License.

## Supplementary of GrSMBMIP (Fettweis et al., 2019)

|                 | PROMICE - GrIS + ice caps<br>(#1683; -0.84±0.61mWE) |      |             |
|-----------------|-----------------------------------------------------|------|-------------|
|                 | Bias                                                | RMSE | Correlation |
| BESSI (EBM)     | 0.38                                                | 0.87 | 0.79        |
| BOX13 (RCM)     | 0.24                                                | 0.86 | 0.77        |
| CESM (GCM)      | 0.11                                                | 0.66 | 0.86        |
| dEBM (EBM)      | -0.06                                               | 0.64 | 0.87        |
| HIRHAM (RCM)    | 0.13                                                | 0.58 | 0.90        |
| IMAU-ITM (EBM)  | -0.02                                               | 0.60 | 0.88        |
| MAR (RCM)       | 0.10                                                | 0.49 | 0.93        |
| MPI-ESM (GCM)   | -0.06                                               | 0.76 | 0.81        |
| NHM-SMAP (RCM)  | 0.40                                                | 0.77 | 0.89        |
| PDD1km          |                                                     |      |             |
| PDD5km          |                                                     |      |             |
| RACMO (RCM)     | -0.07                                               | 0.62 | 0.89        |
| SNOWMODEL (EBM) | -0.30                                               | 0.67 | 0.89        |
| <b>ENSEMBLE</b> |                                                     |      |             |

Table S1. Same as Table 3 but by considering all the measurements, from the PROMICE data base, which are on the main ice sheet or on the peripheral ice caps.

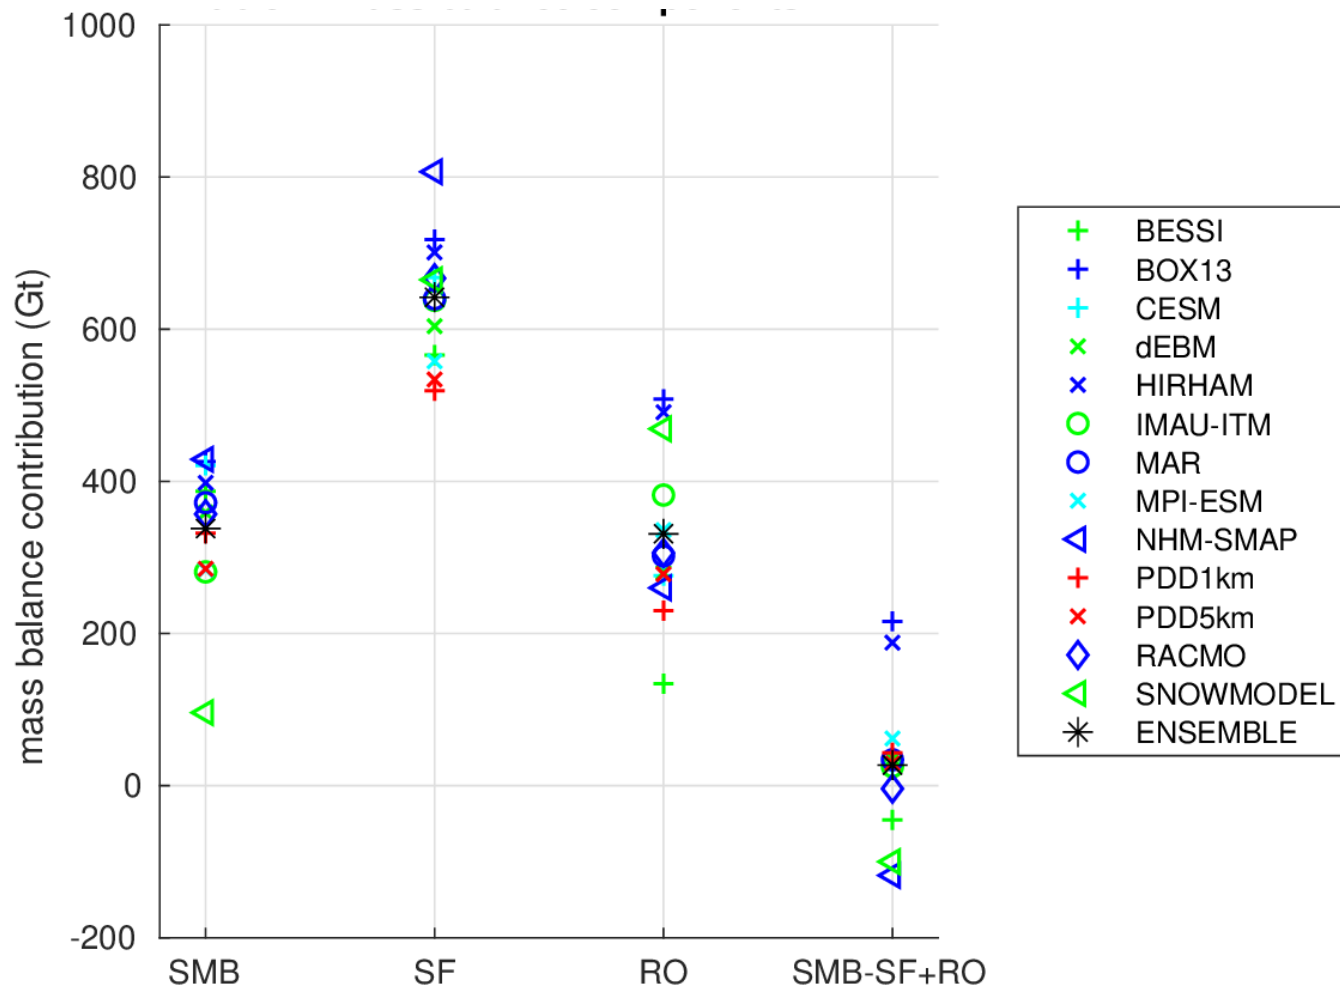

Fig S1: The main mass balance components (as listed in Table2).

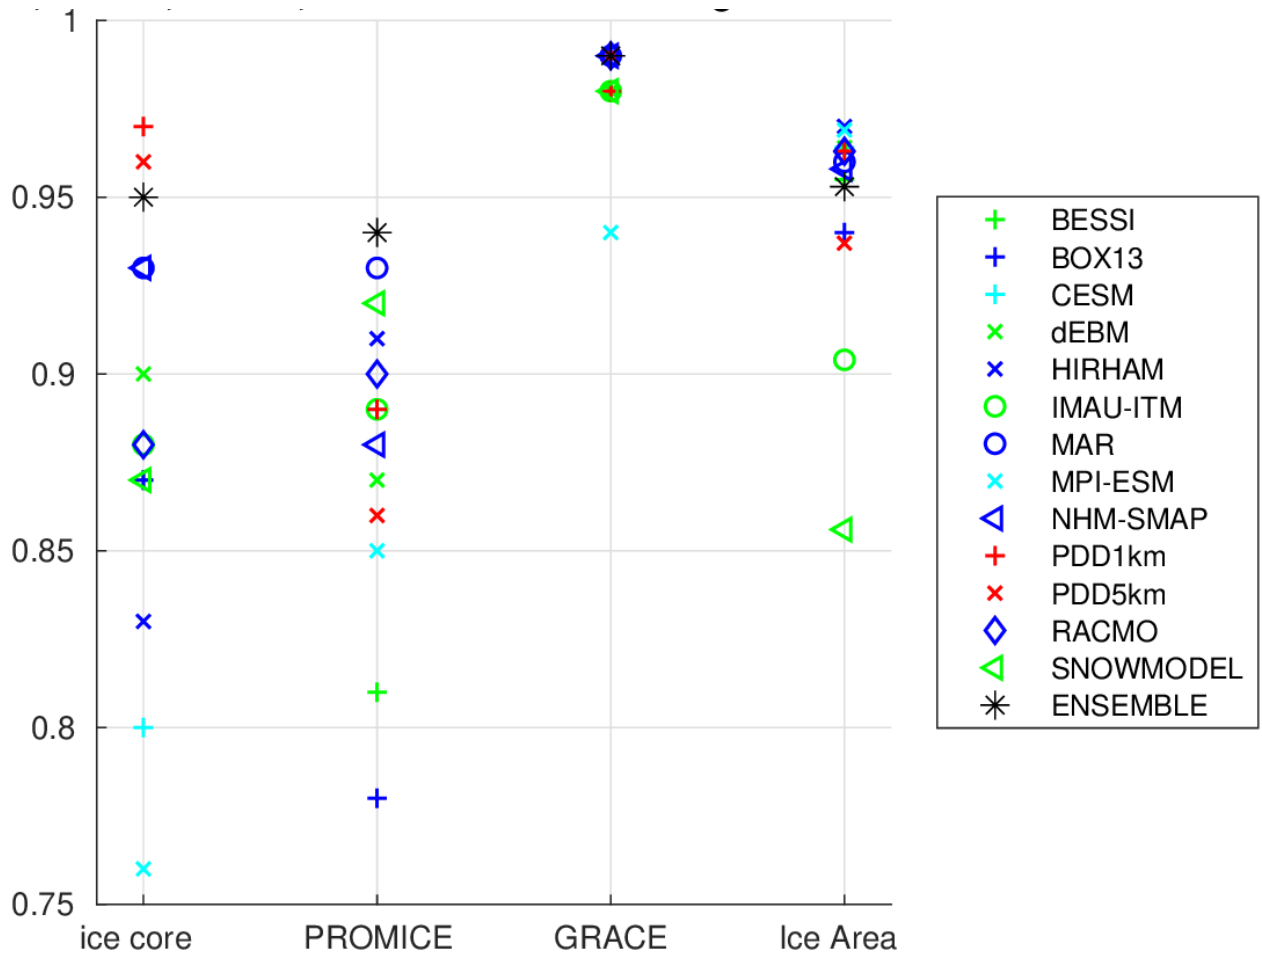

Fig S2: Correlation (listed in Table 1) of each model vs the 4 validation data sets used in GrSMBMIP, distinguishing PDD models (red), EBMs (green), GCMs (cyan) and RCMs (blue)

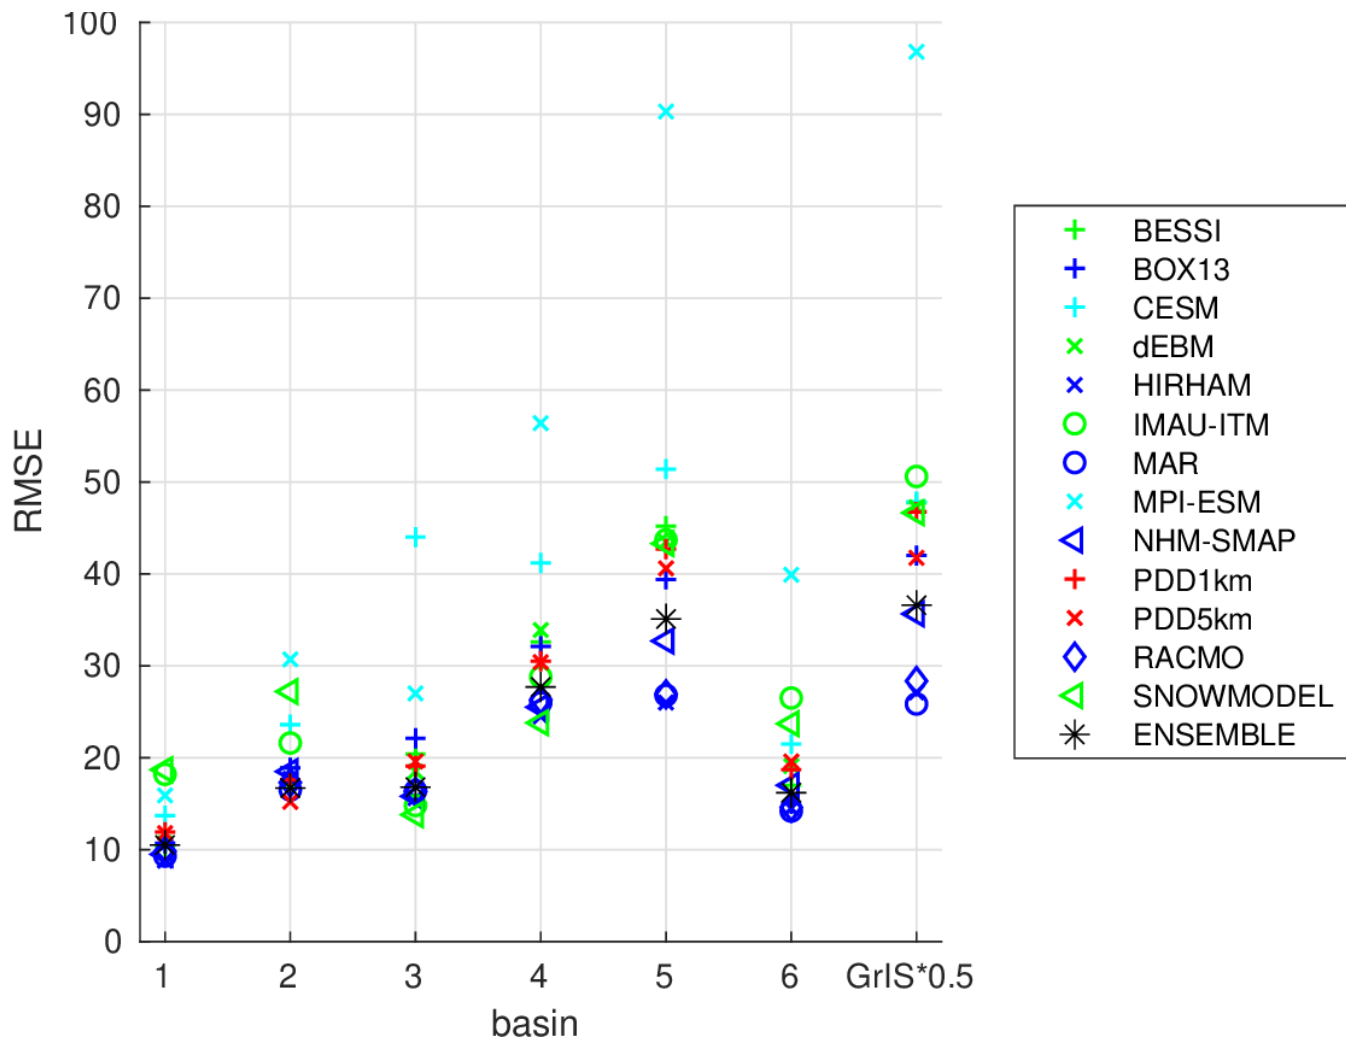

Fig S3: RMSE (listed in Table 2) of each model vs the GRACE based time series.
